# Supplementary material
Source: MDPI journal article supplement (https://www.mdpi.com/1424-8247/14/10/1047)
Supplement: s1 [file s1]

## Supplementary material

*Article*

# Formulation Study of a Co-processed, Rice Starch-Based, All-in-One Excipient for Direct Compression Using SeDeM-ODT Expert System

Karnkamol Trisophon<sup>1</sup>, Nisit Kittipongpatana <sup>1,2</sup>, Phanphen Wattanaarsakit<sup>3</sup>, and Ornanong Suwannapakul Kittipongpatana <sup>1,2\*</sup>

<sup>1</sup> Department of Pharmaceutical Sciences, Faculty of Pharmacy, Chiang Mai University, Chiang Mai 50200, Thailand

<sup>2</sup> Research Center for Development of Local Lanna Rice and Rice Products, Chiang Mai University, Chiang Mai 50200, Thailand

<sup>3</sup> Department of Pharmaceutics and Industrial Pharmacy, Faculty of Pharmaceutical Science, Chulalongkorn University, Bangkok 10330, Thailand

\* Correspondence: ornanong.sk@gmail.com; Tel.: +66 53 944397

**Pearson correlation coefficients for the relation of the SeDeM-ODT parameters**

| SeDeM-ODT<br>parameters | Da     | Dc     | Ie    | Ic (%)  | ICD    | IH    | $\alpha$ | t''   | HR (%) | H (%) | Pf (%) | I $\theta$ | DE     | DCD    | DSD |
|-------------------------|--------|--------|-------|---------|--------|-------|----------|-------|--------|-------|--------|------------|--------|--------|-----|
| Da                      |        |        |       |         |        |       |          |       |        |       |        |            |        |        |     |
| Dc                      | 0.98** |        |       |         |        |       |          |       |        |       |        |            |        |        |     |
| Ie                      | -0.86* | -0.76* |       |         |        |       |          |       |        |       |        |            |        |        |     |
| Ic (%)                  | -0.04  | 0.14   | 0.53  |         |        |       |          |       |        |       |        |            |        |        |     |
| ICD                     | -0.40  | -0.52  | -0.06 | -0.68   |        |       |          |       |        |       |        |            |        |        |     |
| IH                      | 0.06   | -0.12  | -0.55 | -1.00** | 0.67   |       |          |       |        |       |        |            |        |        |     |
| $\alpha$                | 0.21   | 0.08   | -0.62 | -0.77*  | 0.71   | 0.77* |          |       |        |       |        |            |        |        |     |
| t''                     | 0.26   | 0.16   | -0.59 | -0.61   | 0.68   | 0.60  | 0.95**   |       |        |       |        |            |        |        |     |
| HR (%)                  | 0.03   | 0.08   | 0.22  | 0.33    | -0.77* | -0.33 | -0.53    | -0.66 |        |       |        |            |        |        |     |
| H (%)                   | -0.12  | -0.13  | 0.18  | -0.01   | -0.50  | 0.00  | -0.35    | -0.52 | 0.90** |       |        |            |        |        |     |
| Pf (%)                  | 0.34   | 0.26   | -0.43 | -0.44   | -0.10  | 0.44  | 0.24     | 0.25  | 0.17   | 0.41  |        |            |        |        |     |
| I $\theta$              | -0.21  | -0.09  | 0.39  | 0.60    | 0.06   | -0.60 | -0.16    | -0.03 | -0.32  | -0.63 | -0.87* |            |        |        |     |
| DE                      | 0.43   | 0.33   | -0.71 | -0.44   | -0.09  | 0.46  | 0.61     | 0.06  | 0.31   | 0.34  | -0.07  | -0.30      |        |        |     |
| DCD                     | 0.46   | 0.38   | -0.69 | -0.33   | -0.13  | 0.34  | 0.55     | -0.01 | 0.30   | 0.25  | -0.19  | -0.16      | 0.99** |        |     |
| DSD                     | 0.50   | 0.41   | -0.75 | -0.40   | -0.16  | 0.42  | 0.56     | -0.07 | 0.36   | 0.33  | -0.08  | -0.27      | 0.99** | 0.99** |     |

\*\* Correlation is significant at the 0.01

\* Correlation is significant at the 0.05

Da = Bulk density

Dc = Tapped density

Ie = Inter-particle porosity

IC = Carr index

Icd = Cohesive index

IH = Hausner ratio

$\alpha$  = Angle of repose

$t''$  = Powder flow

%HR = Loss on drying

%H = Hygroscopicity

%Pf = Particle < 50

I $\theta$  = Homogeneity index

DE = Effervescence

DCD = Disintegration time with disk

DSD = Disintegration time without disk
